# Supplementary material
Source: PubMed Central journal article supplement (PMC6868462)
Supplement: DC190855SupplementaryData.pdf [file DC190855SupplementaryData.pdf]

SUPPLEMENTARY DATA

**Supplementary Table S1.** Differences among those <18 years that use and do not use Auto Mode at one year.

|                                                                 | Using Auto Mode                 | Discontinued Auto Mode          | p-value |
|-----------------------------------------------------------------|---------------------------------|---------------------------------|---------|
| <b>n</b>                                                        | 7 (39%)                         | 11 (61%)                        | N/A     |
| <b>Age (years)</b>                                              | 13.6 ± 2.9                      | 15.5 ± 2.0                      | 0.12    |
| <b>Percent Time Using CGM Prior to Auto Mode Initialization</b> | 81 ± 16%                        | 64 ± 29%                        | 0.18    |
| <b>Diabetes Duration (years)</b>                                | 4.4 ± 4.7                       | 7.5 ± 4.2                       | 0.16    |
| <b>Gender</b>                                                   |                                 |                                 |         |
| Male                                                            | 4 (57%)                         | 7 (64%)                         | 0.78    |
| Female                                                          | 3 (43%)                         | 4 (36%)                         | 0.78    |
| <b>Baseline HbA1c</b>                                           | 7.7 ± 1.1% (61 ± 11.7 mmol/mol) | 9.0 ± 2.0% (75 ± 22.2 mmol/mol) | 0.14    |
| <b>HbA1c at 1 year</b>                                          | 7.7 ± 0.7% (60 ± 7.3 mmol/mol)  | 8.5 ± 1.3% (70 ± 13.9 mmol/mol) | 0.15    |
| <b>Number Visits (Total 5 Possible)</b>                         | 4.9 ± 0.4                       | 4.7 ± 0.5                       | 0.55    |
| <b>Race</b>                                                     |                                 |                                 |         |
| African                                                         | 0 (0%)                          | 1 (9%)                          | 0.41    |
| Asian                                                           | 3 (43%)                         | 1 (9%)                          | 0.09    |
| Caucasian                                                       | 4 (57%)                         | 8 (73%)                         | 0.50    |
| Native American                                                 | 0 (0%)                          | 1 (9%)                          | 0.41    |
| <b>Highest Education for Subject or Guardian</b>                |                                 |                                 |         |
| Some High School                                                | 1 (14%)                         | 3 (27%)                         | 0.52    |
| Some College                                                    | 0 (0%)                          | 1 (9%)                          | 0.41    |
| College Degree                                                  | 2 (29%)                         | 3 (27%)                         | 0.95    |
| Graduate Degree                                                 | 4 (57%)                         | 2 (18%)                         | 0.09    |
| Declined                                                        | 0 (0%)                          | 2 (18%)                         | 0.23    |
| <b>Prior Insulin Delivery Systems</b>                           |                                 |                                 |         |
| Animas                                                          | 0 (0%)                          | 1 (6%)                          | 0.50    |
| Medtronic – Older                                               | 3 (38%)                         | 9 (50%)                         | 0.56    |
| Medtronic 630G                                                  | 4 (50%)                         | 6 (33%)                         | 0.42    |
| OmniPod                                                         | 1 (13%)                         | 0 (0%)                          | 0.13    |
| Other                                                           | 0 (0%)                          | 2 (11%)                         | 0.33    |
| <b>Prior CGM</b>                                                |                                 |                                 |         |
| Abbott FreeStyle Libre                                          | 1 (14%)                         | 1 (6%)                          | 0.53    |
| Dexcom – G5 or older                                            | 4 (57%)                         | 7 (44%)                         | 0.56    |
| Medtronic Enlite                                                | 1 (14%)                         | 7 (44%)                         | 0.17    |
| None                                                            | 0 (0%)                          | 1 (6%)                          | 0.50    |
| Other                                                           | 1 (14%)                         | 0 (0%)                          | 0.12    |
| <b>Concurrent Dexcom G6 Use</b>                                 | 0 (0%)                          | 6 (55%)                         | 0.02*   |

\* p < 0.05

# SUPPLEMENTARY DATA

**Supplementary Table S2.** Differences among those  $\geq 18$  years that use and do not use Auto Mode at one year.

|                                                                 | Using Auto Mode                         | Discontinued Auto Mode                  | p-value |
|-----------------------------------------------------------------|-----------------------------------------|-----------------------------------------|---------|
| <b>n</b>                                                        | 23 (61%)                                | 15 (39%)                                | N/A     |
| <b>Age (years)</b>                                              | 37.0 $\pm$ 16.8                         | 27.4 $\pm$ 10.6                         | 0.06    |
| <b>Percent Time Using CGM Prior to Auto Mode Initialization</b> | 84 $\pm$ 13%                            | 56 $\pm$ 37%                            | 0.003*  |
| <b>Diabetes Duration (years)</b>                                | 20.8 $\pm$ 12.4                         | 13.7 $\pm$ 11.1                         | 0.08    |
| <b>Gender</b>                                                   |                                         |                                         |         |
| Male                                                            | 11 (48%)                                | 10 (67%)                                | 0.25    |
| Female                                                          | 11 (48%)                                | 5 (33%)                                 | 0.38    |
| Transfeminine                                                   | 1 (4%)                                  | 0 (0%)                                  | 0.41    |
| <b>Baseline HbA1c</b>                                           | 7.7 $\pm$ 1.1% (61 $\pm$ 12.5 mmol/mol) | 7.7 $\pm$ 1.0% (61 $\pm$ 10.7 mmol/mol) | 1.00    |
| <b>HbA1c at 1 year</b>                                          | 7.5 $\pm$ 0.9% (59 $\pm$ 9.7 mmol/mol)  | 7.7 $\pm$ 1.2% (60 $\pm$ 13.1 mmol/mol) | 0.88    |
| <b>Number Visits (Total 5 Possible)</b>                         | 4.6 $\pm$ 0.7                           | 4.5 $\pm$ 0.5                           | 0.51    |
| <b>Race</b>                                                     |                                         |                                         |         |
| African                                                         | 0 (0%)                                  | 1 (7%)                                  | 0.21    |
| Asian                                                           | 3 (13%)                                 | 0 (0%)                                  | 0.14    |
| Caucasian                                                       | 19 (83%)                                | 9 (60%)                                 | 0.12    |
| Middle Eastern                                                  | 0 (0%)                                  | 3 (20%)                                 | 0.03*   |
| Unknown                                                         | 0 (0%)                                  | 1 (7%)                                  | 0.21    |
| Declined                                                        | 1 (4%)                                  | 1 (7%)                                  | 0.76    |
| <b>Highest Education for Subject or Guardian</b>                |                                         |                                         |         |
| High School Degree                                              | 2 (9%)                                  | 0 (0%)                                  | 0.24    |
| Some College                                                    | 1 (4%)                                  | 4 (27%)                                 | 0.05*   |
| College Degree                                                  | 7 (30%)                                 | 3 (20%)                                 | 0.48    |
| Graduate Degree                                                 | 9 (39%)                                 | 3 (20%)                                 | 0.21    |
| Other                                                           | 2 (9%)                                  | 2 (13%)                                 | 0.65    |
| Declined                                                        | 2 (9%)                                  | 3 (20%)                                 | 0.31    |
| <b>Prior Insulin Delivery Systems</b>                           |                                         |                                         |         |
| Animas                                                          | 4 (9%)                                  | 3 (11%)                                 | 0.75    |
| Medtronic – Older                                               | 21 (45%)                                | 11 (39%)                                | 0.65    |
| Medtronic 630G                                                  | 11 (23%)                                | 8 (29%)                                 | 0.62    |
| OmniPod                                                         | 1 (2%)                                  | 3 (7%)                                  | 0.11    |
| Roche                                                           | 1 (2%)                                  | 0 (0%)                                  | 0.44    |
| Tandem                                                          | 2 (4%)                                  | 1 (4%)                                  | 0.88    |
| MDI                                                             | 1 (2%)                                  | 1 (4%)                                  | 0.70    |
| Other                                                           | 6 (13%)                                 | 1 (4%)                                  | 0.19    |
| <b>Prior CGM</b>                                                |                                         |                                         |         |
| Dexcom – G5 or older                                            | 19 (54%)                                | 9 (56%)                                 | 0.90    |
| Medtronic Enlite                                                | 12 (34%)                                | 4 (25%)                                 | 0.51    |
| None                                                            | 1 (3%)                                  | 3 (19%)                                 | 0.05*   |
| Other                                                           | 3 (9%)                                  | 0 (0%)                                  | 0.23    |
| <b>Concurrent Dexcom G6 Use</b>                                 | 4 (17%)                                 | 2 (13%)                                 | 0.73    |

\*  $p < 0.05$
